# Supplementary material for: Seismic Detection of a 600-km Solid Inner Core on Mars
Source: Research Square preprint supplement (doi:10.21203/rs.3.rs-4423842/v1), 2024-06-21
Supplement: Supplementary file 1 [file 29bd2b7f243c1d60d58974f9.docx]

SIGuide for

**Seismic Detection of a 600-km Solid Inner Core on Mars**

Huixing Bi, Daoyuan Sun*, Ningyu Sun, Zhu Mao, Mingwei Dai, Douglas Hemingway

*Corresponding author: [sdy2014@ustc.edu.cn](mailto:xxxxx@xxxx.xxx)

**Supplementary Information** includes Supplementary Information A and B.

**Supplementary Information A** contains additional information on generating synthetics (Section 2), core phases detection (Section 3), inversion (Section 4), validation of the inverted model (Section 5), analysis of the density (Section 6) and composition of the Martian inner core (Section 7).

**Supplementary information B** contains additional information on the individual events analysis for different phases, and inversion results obtained from measurements directly from the vespagrams.
